# Supplementary material
Source: MDPI journal article supplement (https://www.mdpi.com/2071-1050/13/21/12326)
Supplement: s1 [file s1]

**Table S1.** Available nitrogen in the soil ( $\text{kg ha}^{-1}$ ; 0–30 cm) of the experiment sites in 2015 and 2016.

| Time of Soil Sampling            | 2015  | 2016 |
|----------------------------------|-------|------|
| Beginning of season <sup>1</sup> | 111.5 | 37.2 |
| Mid-season <sup>2</sup>          | 23.5  | 28.5 |
| End of season <sup>3</sup>       | 7.0   | 19.4 |

<sup>1</sup> Jun 2nd, 2015 and May 20th, 2016.

<sup>2</sup> September 1st, 2015 and August 2nd, 2016.

<sup>3</sup> October 12th, 2015 and October 13th, 2016.

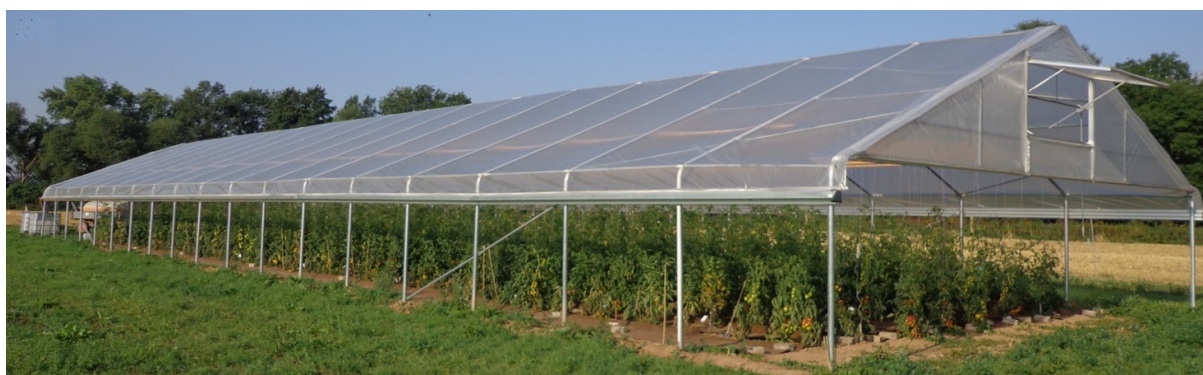

**Figure S1.** Organic low-input tomato production under a rainout shelter. (Photo: L. Chea)

**Table S2.** Year of release, breeding background, average fruit weight, and usual production systems of 60 tomato cultivars used in Germany, Switzerland, and Austria.

| Cultivar Name                                | Year of Re-lease  | Breeder         | Breeding Back-ground | Average Fruit Weight (g) | Production Systems |
|----------------------------------------------|-------------------|-----------------|----------------------|--------------------------|--------------------|
| Salad cultivars ( $>52\text{g fruit}^{-1}$ ) |                   |                 |                      |                          |                    |
| Previa F <sub>1</sub>                        | 2011 <sup>2</sup> | Gautier         | CON                  | 173.1                    | a,c                |
| Garance F <sub>1</sub>                       | 2015 <sup>2</sup> | Agri Obtentions | CON                  | 154.5                    | e                  |
| <b>Green Zebra</b>                           | 1972 <sup>3</sup> | Wagner          | ORG                  | 153.0                    | c                  |
| Diplom F <sub>1</sub>                        | 1989 <sup>4</sup> | Hild            | CON                  | 136.8                    | b                  |
| <b>Cappricia F<sub>1</sub></b>               | 2009 <sup>2</sup> | Rijk Zwaan      | CON                  | 131.5                    | g                  |
| Rougella F <sub>1</sub>                      | 1999 <sup>2</sup> | Rijk Zwaan      | CON                  | 126.4                    | c                  |
| Sparta F <sub>1</sub>                        | 1994 <sup>5</sup> | Enza            | CON                  | 125.8                    | e                  |
| <b>Bocati F<sub>1</sub></b>                  | 2011 <sup>2</sup> | Enza            | CON                  | 124.4                    | c,d                |
| Phantasia F <sub>1</sub>                     | 2006 <sup>2</sup> | De Ruiters      | CON                  | 122.7                    | a,b                |
| Mecano F <sub>1</sub>                        | 2004 <sup>2</sup> | Rijk Zwaan      | CON                  | 122.2                    | e,g                |
| Hamlet F <sub>1</sub>                        | 2009 <sup>2</sup> | Nunhems         | CON                  | 120.4                    | d                  |
| <b>Lyterno F<sub>1</sub></b>                 | 2010 <sup>2</sup> | Rijk Zwaan      | CON                  | 115.9                    | e,f,g              |
| Nordica F <sub>1</sub>                       | 2014 <sup>2</sup> | Enza            | CON                  | 115.5                    | c,d,e              |
| Moneymaker                                   | 1972 <sup>2</sup> | Hild            | CON                  | 113.8                    | a,c                |
| Pannovy F <sub>1</sub>                       | 1991 <sup>5</sup> | Syngenta        | CON                  | 107.6                    | c,e                |
| <b>Roterno F<sub>1</sub></b>                 | 2007 <sup>2</sup> | Rijk Zwaan      | CON                  | 106.7                    | d,e,f              |
| Hildares F <sub>1</sub>                      | 1978 <sup>2</sup> | Hild            | CON                  | 99.0                     | b                  |
| Bonner Beste                                 | 1955 <sup>4</sup> | Reinhold        | ND                   | 95.2                     | *                  |
| Tica                                         | 2011 <sup>2</sup> | Kultursaat      | ORG                  | 94.2                     | c,e                |
| Ricca                                        | 2015 <sup>6</sup> | Reinsaat        | ORG                  | 92.1                     | e                  |
| Aroma                                        | 2015 <sup>7</sup> | Kultursaat      | ORG                  | 87.1                     | c                  |

|                                                 |                    |                          |     |      |         |
|-------------------------------------------------|--------------------|--------------------------|-----|------|---------|
| Rheinlands Ruhm                                 | 1945 <sup>8</sup>  | Unknown                  | ND  | 85.0 | b       |
| Lukullus                                        | 1956 <sup>4</sup>  | Reinhold                 | ND  | 83.9 | *       |
| Goldene Königin                                 | 1882 <sup>14</sup> | Unknown                  | ND  | 76.6 | c,d     |
| <b>Harzfeuer F<sub>1</sub></b>                  | 1959 <sup>4</sup>  | IZQ                      | CON | 76.4 | a,b,c,d |
| <b>Auriga</b>                                   | 1980 <sup>4</sup>  | Saatzucht<br>Quedlinburg | CON | 71.5 | c,e     |
| Haubners Vollendung                             | 1950 <sup>8</sup>  | Unknown                  | ND  | 70.3 | *       |
| Dorenia                                         | 2012 <sup>2</sup>  | Kultursaat               | ORG | 68.2 | a       |
| Roi Humbert Jaune                               | 1898 <sup>9</sup>  | Unknown                  | ND  | 64.9 | c       |
| Hellfrucht                                      | 1955 <sup>4</sup>  | Fetzer                   | ND  | 64.3 | *       |
| <b>Campari F<sub>1</sub></b>                    | 1996 <sup>2</sup>  | Enza                     | CON | 63.3 | e,f     |
| Matina                                          | 1978 <sup>2</sup>  | Hild                     | CON | 55.2 | a,b,c,d |
| Black Plum                                      | 1998 <sup>10</sup> | Unknown                  | ND  | 52.2 | a,c     |
| Cocktail cultivars (<52 g fruit <sup>-1</sup> ) |                    |                          |     |      |         |
| <b>Amoroso F<sub>1</sub></b>                    | 2005 <sup>2</sup>  | Rijk Zwaan               | CON | 50.8 | f,g     |
| <b>Annamay F<sub>1</sub></b>                    | 2010 <sup>2</sup>  | Enza                     | CON | 46.0 | e       |
| Quedlinburger Frühe                             | 1951 <sup>8</sup>  | Unknown                  | ND  | 43.4 | a       |
| Liebe                                           |                    |                          |     |      |         |
| Ruthje                                          | 2008 <sup>4</sup>  | Kultursaat               | ORG | 42.3 | c,e     |
| König Humbert                                   | 1880 <sup>11</sup> | Unknown                  | ND  | 37.7 | *       |
| Clou                                            | 2010 <sup>2</sup>  | OOTP                     | ORG | 34.4 | a,b     |
| <b>Tastery F<sub>1</sub></b>                    | 2011 <sup>2</sup>  | Rijk Zwaan               | CON | 33.5 | d,e,f,g |
| <b>Primabella</b>                               | 2012 <sup>2</sup>  | OOTP                     | ORG | 28.1 | a,c     |
| <b>Sakura F<sub>1</sub></b>                     | 1999 <sup>2</sup>  | Enza                     | CON | 23.7 | c,d,e,f |
| <b>Black Cherry</b>                             | 2009 <sup>2</sup>  | Reinsaat                 | ND  | 23.0 | c,d     |
| Cerise Gelb                                     | 2005 <sup>12</sup> | OOTP                     | ND  | 22.9 | a,b     |
| Yellow Submarine                                | 2002 <sup>2</sup>  | Unknown                  | ND  | 22.2 | c       |
| Zuckertraube                                    | 1994 <sup>2</sup>  | Reinsaat                 | ND  | 21.9 | a,b,c   |
| Dorada                                          | 2010 <sup>2</sup>  | OOTP                     | ORG | 21.3 | a,b     |
| <b>Primavera</b>                                | 2010 <sup>2</sup>  | OOTP                     | ORG | 21.3 | a,b     |
| Philovita F <sub>1</sub>                        | 2007 <sup>2</sup>  | De Ruiter                | CON | 19.4 | a,b,c   |
| Trixi                                           | 2014 <sup>4</sup>  | Kultursaat               | ORG | 19.3 | c,e     |
| Trilly F <sub>1</sub>                           | 2006 <sup>2</sup>  | ISI Sementi              | CON | 19.3 | d       |
| <b>Benarys Gartenfreude<sup>1</sup></b>         | 1950 <sup>4</sup>  | Benary                   | CON | 18.5 | *       |
| <b>Bartelly F<sub>1</sub></b>                   | 2014 <sup>2</sup>  | De Bolster               | ORG | 18.4 | c,e     |
| Golden Pearl F <sub>1</sub>                     | 2008 <sup>2</sup>  | Hild                     | CON | 18.4 | d       |
| <b>Resi</b>                                     | 2010 <sup>2</sup>  | OOTP                     | ND  | 17.3 | a,b     |
| <b>Supersweet 100 F<sub>1</sub></b>             | 1992 <sup>2</sup>  | Syngenta                 | CON | 15.7 | a,b,c,d |
| <b>Goldita</b>                                  | 1997 <sup>8</sup>  | De Ruiter/Arche<br>Noah  | CON | 15.6 | c       |
| Sliwowidnij                                     | 2012 <sup>13</sup> | Unknown                  | ND  | 9.6  | C       |
| Rote Murmel                                     | 1995 <sup>13</sup> | Unknown                  | ND  | 5.7  | a,b     |
| Golden Currant                                  | 1975 <sup>13</sup> | Unknown                  | ND  | 5.4  | a,b     |

Cultivars shown in bold are the 20 cultivars selected from 2015 for further evaluation in 2016.

Year of release in italic are not known with certainty.

IZQ = Institut für Züchtungsforschung Quedlinburg; OOTP = Organic Outdoor Tomato Project ([www.uni-kassel.de/go/freilandtomatenprojekt](http://www.uni-kassel.de/go/freilandtomatenprojekt), accessed on 01 August 2021).

<sup>1</sup> Syn. Freude, syn. Gardener's Delight; <sup>2</sup> European Commission [1]; <sup>3</sup> T. Wagner (2016) pers. comm.; <sup>4</sup> Bundessortenamt (2016) pers. comm. ([www.bundessortenamt.de](http://www.bundessortenamt.de)); <sup>5</sup>

Bundessortenamt [2]; <sup>6</sup> Reinsaat (2015) pers. comm. ([www.reinsaat.at](http://www.reinsaat.at)); <sup>7</sup> S.

Wedemeyer/Kultursaat e.V. (2016) pers. comm. ([www.kultursaat.org](http://www.kultursaat.org)); <sup>8</sup> Arche Noah (2015) pers. comm. ([www.arche-noah.at](http://www.arche-noah.at)); <sup>9</sup> Haage and Schmidt [3]; <sup>10</sup> ProSpecieRara

(2016) pers. comm. (www.prospezierara.de); <sup>11</sup> Munro [4]; <sup>12</sup> Dreschflegel [5]; <sup>13</sup> Culinaris (2015) pers. comm. (www.culinaris-saatgut.de); <sup>14</sup> Livingston and Smith [6]

Breeding background: CON = Conventional, ORG = Organic, ND = Not documented.

Weight per fruit = average weight per fruit (g) derived from the experiment 2015.

Suitable production system of the cultivars: a = organic outdoor, b = conventional outdoor, c = extensive organic indoor, d = extensive conventional indoor, e = intensive organic indoor, f = intensive conventional indoor, g = hydroponic, \* = hardly grown anymore. This information was collected with extension services, research stations, breeders, seed companies, and the IPK Genebank.

**Table S3.** Statistics for 28 traits of 60 tomato cultivars.

| Parameters                                     | Min   | 1Q    | Median | 3Q    | Max   | Mean  | Variance | Significance | CV (%) |
|------------------------------------------------|-------|-------|--------|-------|-------|-------|----------|--------------|--------|
| Plant morphological characteristics            |       |       |        |       |       |       |          |              |        |
| Plant height (cm)                              | 183.0 | 235.0 | 264.0  | 299.3 | 356.0 | 268.4 | 1733.9   | ***          | 15.5   |
| Leaf number (plant <sup>-1</sup> )             | 32.0  | 36.0  | 39.0   | 42.0  | 57.0  | 39.7  | 26.2     | ***          | 12.9   |
| Leaf and stem biomass (g plant <sup>-1</sup> ) | 562   | 1123  | 1388   | 1702  | 30640 | 1462  | 239077   | ***          | 33.4   |
| Fruit yield (g plant <sup>-1</sup> )           | 540   | 2736  | 3504   | 4495  | 5797  | 3494  | 1366000  | ***          | 33.4   |
| AFW (g fruit <sup>-1</sup> )                   | 5.5   | 21.8  | 63.7   | 109.0 | 171.5 | 67.1  | 2127.0   | ***          | 68.7   |
| Fruit number (plant <sup>-1</sup> )            | 18.0  | 42.0  | 56.5   | 110.8 | 295.0 | 78.5  | 2694.8   | ***          | 66.1   |
| Harvest index                                  | 0.24  | 0.73  | 0.80   | 0.83  | 0.87  | 0.76  | 0.01     | ***          | 15.5   |
| Leaf minerals (mg g <sup>-1</sup> DM)          |       |       |        |       |       |       |          |              |        |
| C                                              | 375.0 | 384.3 | 388.0  | 393.8 | 406.0 | 388.8 | 49.6     | ***          | 1.8    |
| N                                              | 20.5  | 22.9  | 23.9   | 25.9  | 28.6  | 24.2  | 3.3      | ***          | 7.6    |
| P                                              | 1.4   | 1.6   | 1.7    | 1.8   | 2.2   | 1.7   | 0.0      | ***          | 9.0    |
| K                                              | 19.6  | 24.3  | 26.5   | 29.0  | 33.4  | 26.5  | 10.1     | ***          | 12.0   |
| Mg                                             | 2.6   | 3.4   | 3.7    | 4.2   | 6.1   | 3.9   | 0.6      | ***          | 19.3   |
| Ca                                             | 36.7  | 46.9  | 52.2   | 56.9  | 69.2  | 52.1  | 51.2     | ***          | 13.7   |
| S                                              | 4.1   | 5.2   | 6.0    | 6.8   | 8.1   | 6.0   | 0.7      | ***          | 14.4   |
| Fruit minerals (mg 100 g <sup>-1</sup> FW)     |       |       |        |       |       |       |          |              |        |
| P                                              | 21.3  | 24.7  | 28.0   | 31.1  | 55.5  | 28.9  | 35.2     | ***          | 20.5   |
| K                                              | 211.3 | 243.2 | 274.2  | 295.8 | 441.3 | 272.5 | 1563.0   | ***          | 14.5   |
| Mg                                             | 8.0   | 9.6   | 10.7   | 12.4  | 20.0  | 11.1  | 4.5      | ***          | 19.1   |
| Ca                                             | 7.3   | 10.0  | 12.1   | 14.3  | 24.7  | 12.6  | 11.9     | ***          | 27.4   |
| S                                              | 11.7  | 13.4  | 14.6   | 16.7  | 30.5  | 15.4  | 9.0      | ***          | 19.5   |
| Fruit quality characteristics                  |       |       |        |       |       |       |          |              |        |
| DM (%)                                         | 5.0   | 5.6   | 6.8    | 8.1   | 10.8  | 7.0   | 2.4      | ***          | 22.1   |
| TSS (°Brix)                                    | 3.7   | 4.4   | 5.1    | 6.3   | 8.7   | 5.5   | 1.6      | ***          | 23.4   |
| TA (%)                                         | 0.25  | 0.32  | 0.35   | 0.40  | 0.53  | 0.36  | 0.03     | ***          | 14.7   |
| TPC (mg GAE 100 g <sup>-1</sup> FW)            | 1.1   | 1.6   | 1.9    | 2.3   | 4.4   | 2.0   | 0.3      | ***          | 29.5   |
| Fruit color                                    |       |       |        |       |       |       |          |              |        |
| L*                                             | 47.7  | 51.1  | 53.4   | 55.5  | 69.7  | 54.2  | 19.8     | ***          | 8.2    |
| a*                                             | -11.0 | 14.1  | 19.6   | 22.6  | 27.4  | 16.3  | 82.1     | ***          | 55.7   |
| b*                                             | 9.5   | 22.8  | 25.9   | 29.1  | 45.7  | 27.1  | 42.8     | ***          | 24.1   |
| C*                                             | 11.4  | 29.5  | 33.4   | 37.2  | 46.1  | 33.2  | 32.3     | ***          | 17.1   |
| °h                                             | 46.2  | 48.6  | 51.7   | 57.8  | 107.5 | 58.5  | 261.1    | ***          | 27.6   |

Min = minimum value; 1Q = first quartile; 3Q = third quartile; Max = maximum value; CV = coefficient of variation; DM = dry matter; FW = fresh weight; AFW = average fruit weight; TSS = total soluble solid; TA = titratable acidity; TPC = total phenolic concentration; \*\*\* indicates significant difference among cultivars in each trait at  $p < 0.001$ .

**Table S4.** Analysis of variance (ANOVA) of cocktail and salad cultivars and mean comparison between these two groups of cultivars.

| Parameter                                      | Cocktail Cultivars ( <i>n</i> = 27) |              |       |       | Salad Cultivars ( <i>n</i> = 33) |              |       |       |
|------------------------------------------------|-------------------------------------|--------------|-------|-------|----------------------------------|--------------|-------|-------|
|                                                | F-test                              | Mean ± SD    | Min   | Max   | F-test                           | Mean ± SD    | Min   | Max   |
| Plant morphological characteristics            |                                     |              |       |       |                                  |              |       |       |
| Plant height (cm)                              | ***                                 | 294.7 ± 44.6 | 179.2 | 391.3 | ***                              | 250.2 ± 38.1 | 158.0 | 367.0 |
| Leaf number (plant <sup>-1</sup> )             | ***                                 | 43 ± 7       | 29    | 65    | ***                              | 38 ± 4       | 21    | 51    |
| Leaf and stem biomass (g plant <sup>-1</sup> ) | ***                                 | 1499 ± 687   | 337   | 4,621 | ***                              | 1436 ± 421   | 386   | 2780  |
| Harvest index                                  | ***                                 | 0.7 ± 0.2    | 0.2   | 0.9   | ***                              | 0.8 ± 0.1    | 0.5   | 0.9   |
| Fruit yield (g plant <sup>-1</sup> )           | ***                                 | 2579 ± 867   | 472   | 4650  | ***                              | 4232 ± 1,007 | 1925  | 7209  |
| Weight per fruit (g fruit <sup>-1</sup> )      | ***                                 | 23.5 ± 11.6  | 4.0   | 50.0  | **                               | 101.5 ± 32.0 | 52.0  | 174.0 |
| Fruit number (plant <sup>-1</sup> )            | ***                                 | 122 ± 53     | 43    | 333   | ***                              | 44 ± 12      | 15    | 101   |
| Leaf minerals (mg g <sup>-1</sup> DM)          |                                     |              |       |       |                                  |              |       |       |
| C                                              | ***                                 | 387.9 ± 9.1  | 369.9 | 414.8 | ***                              | 389.6 ± 8.8  | 360.3 | 414.1 |
| N                                              | *                                   | 23.9 ± 3.2   | 17.0  | 34.5  | ns                               | 24.4 ± 3.0   | 17.3  | 31.9  |
| P                                              | ***                                 | 1.7 ± 0.2    | 1.2   | 2.3   | ***                              | 1.8 ± 0.2    | 1.4   | 2.3   |
| K                                              | ***                                 | 26.0 ± 4.8   | 17.2  | 37.7  | **                               | 26.9 ± 4.0   | 18.5  | 37.3  |
| Mg                                             | ***                                 | 4.2 ± 1.0    | 2.4   | 6.6   | ***                              | 3.7 ± 0.7    | 2.2   | 5.9   |
| Ca                                             | ***                                 | 53.7 ± 9.3   | 31.6  | 75.1  | ***                              | 50.7 ± 7.9   | 30.7  | 74.7  |
| S                                              | ***                                 | 5.7 ± 1.1    | 3.5   | 9.0   | ***                              | 6.1 ± 1.2    | 3.5   | 9.6   |
| Fruit minerals (mg 100 g <sup>-1</sup> FM)     |                                     |              |       |       |                                  |              |       |       |
| P                                              | ***                                 | 35.1 ± 7.5   | 22.4  | 62.3  | ***                              | 29.6 ± 4.6   | 20.2  | 43.0  |
| K                                              | ***                                 | 293.1 ± 51.1 | 206.2 | 475.1 | ***                              | 291.0 ± 40.8 | 202.1 | 410.0 |
| Mg                                             | ***                                 | 11.9 ± 2.4   | 7.3   | 20.2  | ***                              | 10.5 ± 1.7   | 6.7   | 15.2  |
| Ca                                             | ***                                 | 15.9 ± 8.2   | 6.5   | 85.7  | ***                              | 13.6 ± 3.9   | 5.0   | 28.2  |
| S                                              | ***                                 | 18.2 ± 4.4   | 12.5  | 34.7  | ***                              | 15.4 ± 2.3   | 10.8  | 23.4  |
| Fruit quality characteristics                  |                                     |              |       |       |                                  |              |       |       |
| DM (%)                                         | ***                                 | 8.0 ± 1.4    | 4.8   | 13.1  | *                                | 5.6 ± 1.0    | 3.1   | 8.4   |
| TSS (°Brix)                                    | ***                                 | 6.5 ± 1.2    | 3.9   | 9.2   | ***                              | 4.4 ± 0.6    | 3.2   | 7.7   |
| TA (%)                                         | ns                                  | 0.4 ± 0.1    | 0.3   | 0.7   | ***                              | 0.4 ± 0.1    | 0.2   | 0.9   |
| TPC (mg GAE 100 g <sup>-1</sup> FW)            | ***                                 | 260.1 ± 74.5 | 152.3 | 544.5 | ***                              | 176.0 ± 41.0 | 107.2 | 324.4 |
| Fruit color                                    |                                     |              |       |       |                                  |              |       |       |
| L*                                             | ***                                 | 52.7 ± 5.2   | 46.3  | 68.5  | ***                              | 53.7 ± 3.4   | 46.7  | 68.1  |
| a*                                             | ***                                 | 11.4 ± 7.3   | -4.0  | 22.5  | ***                              | 21.6 ± 7.8   | -11.1 | 31.6  |
| b*                                             | ***                                 | 26.0 ± 7.7   | 9.3   | 43.1  | ***                              | 29.3 ± 5.6   | 18.2  | 53.2  |
| C*                                             | ***                                 | 29.8 ± 6.2   | 10.9  | 43.2  | ***                              | 37.4 ± 5.2   | 23.9  | 53.4  |
| °h                                             | ***                                 | 64.4 ± 16.1  | 44.1  | 96.2  | ***                              | 53.6 ± 12.3  | 42.7  | 107.8 |

DM = dry matter; FW = fresh weight; TSS = total soluble solid; TA = titratable acidity; TPC = total phenolic concentration; ns= non-significant difference; \*, \*\*, and \*\*\* = significant difference at  $p < 0.05$ ,  $p < 0.01$ , and  $p < 0.001$  respectively.

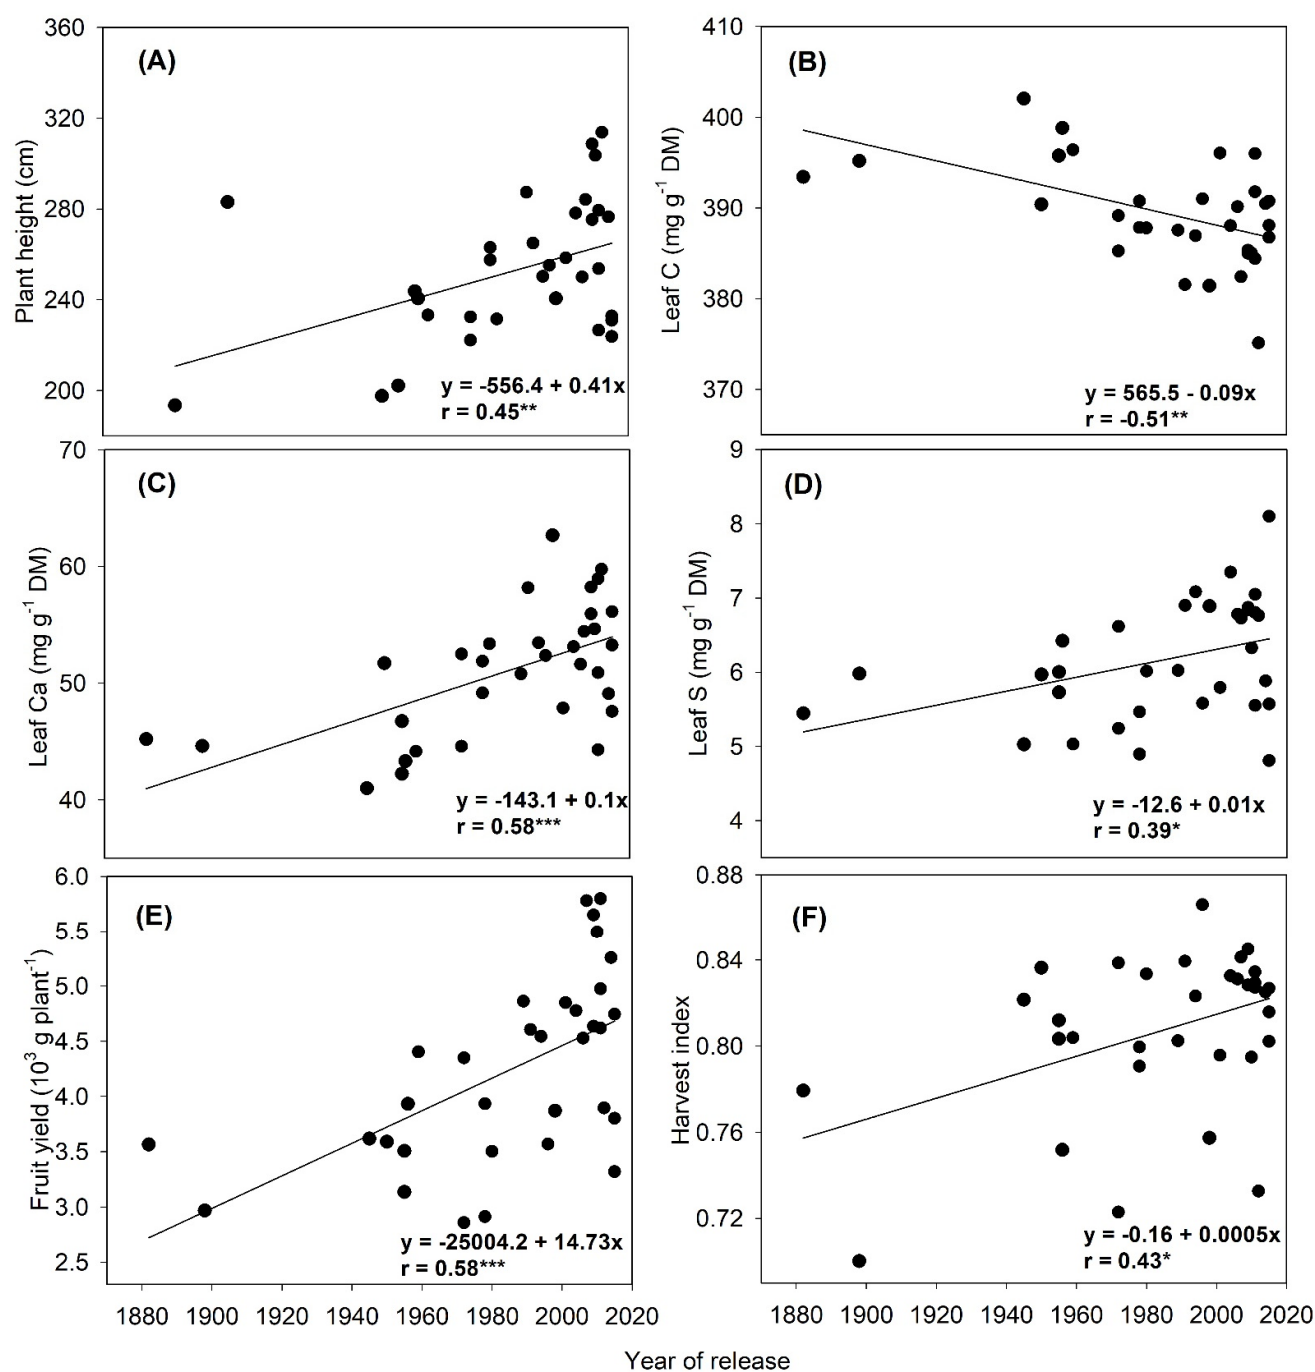

**Figure S2.** Performance of 33 salad tomato cultivars in organic low-input production in 2015. Pearson correlations between year of cultivar release with (A) plant height, (B) leaf C content, (C) leaf Ca content, (D) leaf S content, (E) fruit yield, and (F) harvest index. The correlation among cocktail cultivars was not significant. \*, \*\*, and \*\*\* = significant at  $p < 0.05$ ,  $p < 0.01$ , and  $p < 0.001$ , respectively.

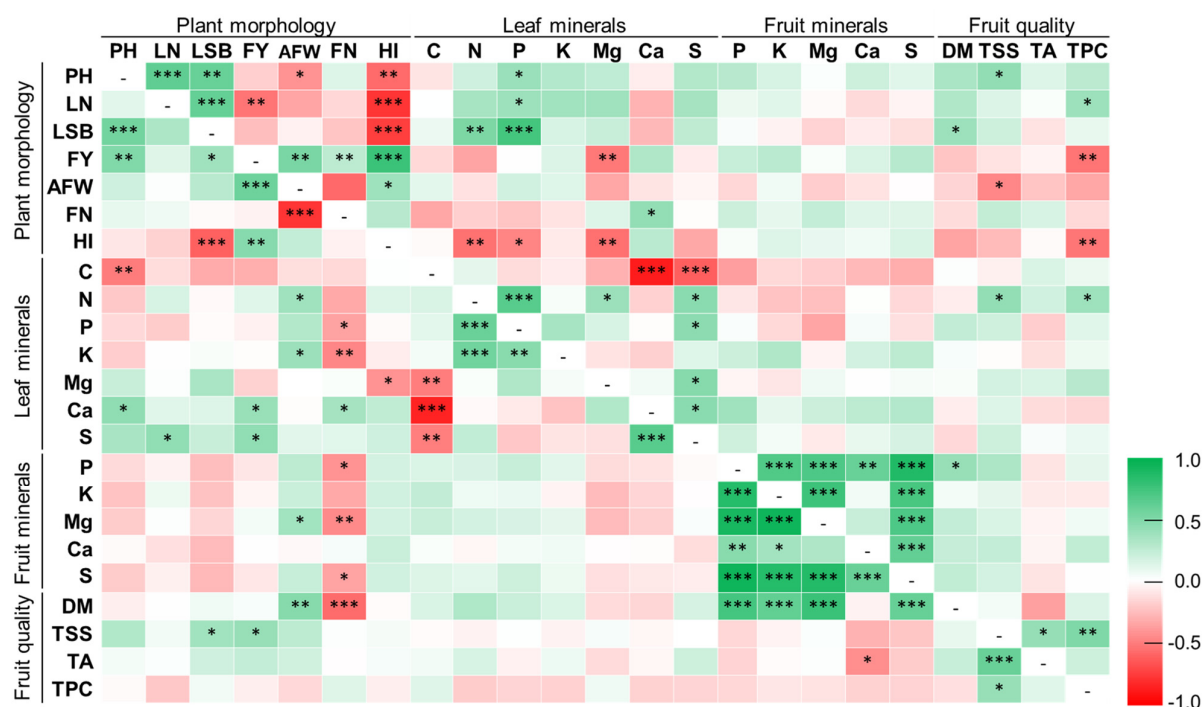

**Figure S3.** Correlation among plant morphology and fruit quality traits of salad ( $n = 33$ , lower diagonal) and cocktail ( $n = 27$ , upper diagonal) tomato cultivars. Color intensity represents the correlation coefficient. \*, \*\*, and \*\*\* indicate significant correlation at  $p < 0.05$ ,  $p < 0.01$ , and  $p < 0.001$ , respectively. PH = plant height, LN = leaf number, LSB = leaf and stem biomass, FY = fruit yield, AFW = average fruit weight, FN = fruit number, HI = harvest index, DM = dry matter, TSS = total soluble solid; TA = titratable acidity; TPC = total phenolic concentration.

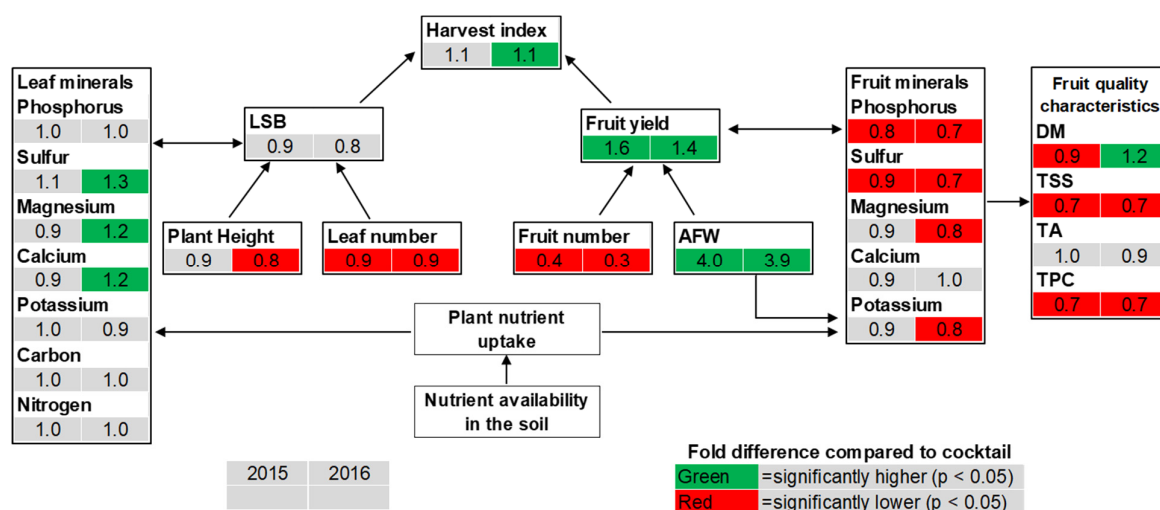

**Figure S4.** Summary of plant morphological characteristics and fruit quality of salad ( $n = 8$ ) and cocktail ( $n = 12$ ) cultivars grown in 2015 and 2016. The values are presented as fold differences between salad and cocktail cultivars (salad/cocktail). The significantly higher ( $p < 0.05$ ) values of salad compared with cocktail cultivars are indicated in green and the significantly lower ( $p < 0.05$ ) values are indicated in red. LSB = leaf and stem biomass; AFW = average fruit weight; DM = dry matter; TSS = total soluble solid; TA = titratable acidity; TPC = total phenolic concentration.

## References

1. European Commission. *Plant variety catalogues & databases: Vegetable species*. Available online: [http://ec.europa.eu/food/plant/plant\\_propagation\\_material/plant\\_variety\\_catalogues\\_databases/search//public/index.cfm?event=SearchForm&ctl\\_type=H](http://ec.europa.eu/food/plant/plant_propagation_material/plant_variety_catalogues_databases/search//public/index.cfm?event=SearchForm&ctl_type=H) (accessed on 13 June 2016).
2. Bundessortenamt. *Beschreibende Sortenliste: Fruchtgemüse, Blattgemüse*; Landbuch Verlagsgesellschaft mbH: Hannover, Germany, 1997 (in German).
3. Haage; Schmidt. *Verzeichniss von Blumenzwiebeln und Knollengewächsen für Herbst*; Erfurt, Germany, 1989 (in German).
4. Munro, N. *Heritage seed library: Sowing, growing, sharing*; Garden Organic: London, UK, 2014.
5. Dreschflegel. *Saaten and Taten*; Dreschflegel: Witzenhausen, Germany, 2005 (in German).
6. Livingston, A.W.; Smith, A.F. *Livingston and the tomato*; Ohio State University Press: Columbus, OH, USA, 1998, ISBN 0814250092.
